# Supplementary material for: A Descriptive Analysis of the Relationship between Social Media Use and Vaccine Hesitancy among a Sample of Unvaccinated Adults in Canada
Source: MDPI journal article supplement (doi:10.3390/vaccines10122096), 2022-12-07
Supplement: s1 [file s1]

## Supplementary Material File S1 – Survey Instrument

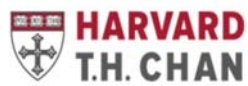

SCHOOL OF PUBLIC HEALTH  
Powerful ideas for a healthier world

If you intend to use this questionnaire for your project, please cite the publication and inform the authors by sending an e-mail to [preparedness@hsph.harvard.edu](mailto:preparedness@hsph.harvard.edu)

### English version

#### 1. Have you taken the COVID-19 vaccine? (Screening question)

- Yes, I received two or more doses
- Yes, I received one dose and the vaccine I took does not require a second dose
- I have received one dose of a two-dose COVID-19 vaccine and I plan to get my second dose
- I have received one dose of a two-dose COVID-19 vaccine but I am not sure if I will get my second dose
- I have received one dose of a two-dose COVID-19 vaccine but I do not plan to get the second dose
- Not yet, but I have an appointment scheduled
- No, and I do not have an appointment scheduled

#### 2. What is your age?

- 18-24
- 25-34
- 35-44
- 45-54
- Over 54

#### 3. What is your sex?

- Male
- Female

#### 4. Are you a worker in any of the following categories? [select all that apply]

- Healthcare or social worker
- Residential facility worker
- Public health worker
- Correctional facilities worker
- Vaccine manufacturing or distribution worker
- Pharmacy worker
- Teacher or school staff
- Food processing worker

- Grocery store worker
- Postal and shipping worker
- Transportation worker
- Police or firefighter
- Volunteer
- Other

**5. Please select your region of residence:**

- Alberta
- British Columbia
- Manitoba
- New Brunswick
- Newfoundland and Labrador
- Northwest Territories
- Nova Scotia
- Nunavut
- Ontario
- Prince Edward Island
- Quebec
- Saskatchewan
- Yukon
- Other

**6. What race/ethnicity do you consider yourself?**

- White, Non-Hispanic
- Black, Non-Hispanic
- Asian, Non-Hispanic
- Two or more races
- Hispanic
- Prefer not to say
- Other, please specify: \_\_\_\_\_

**7. What is the highest level of schooling you have completed?**

- Less than high school
- High school or equivalent
- Some college
- Bachelor's degree
- Post-graduate degree (i.e. Master, PhD, MD, etc)

- Other

**8. Select the employment status that best describes your current situation [select one option only]:**

- I am working - paid employee
- I am working - self-employed
- I am not working - on unemployment
- I am not working - on paid leave or furloughed
- I am not working - searching for work
- I am retired
- I am not working - on disability or worker's comp
- I am not working - and not looking for a job
- Other

**9. Have you been diagnosed with COVID-19 by a healthcare worker or lab test result?**

- Yes, over a year ago
- Yes, in the past 12 months
- No

**10. Did any of your close family members or friends experience any of the following? [Check all that apply]:**

- Tested positive for COVID-19 and had no symptoms or mild symptoms
- Tested positive for COVID-19 and had severe symptoms
- Died of COVID-19
- Lost their job or had a salary reduction due to COVID-19
- Got vaccinated for COVID-19 and had a positive experience
- None of my close family or friends experienced any of the above situations

**11. How concerned are you about any of the following situations?**

|                                                                                                                                                      | Very concerned | Somewhat concerned | Not concerned |
|------------------------------------------------------------------------------------------------------------------------------------------------------|----------------|--------------------|---------------|
| Contracting COVID-19 at work? (For example: your work settings that is not your home)                                                                |                |                    |               |
| Contracting COVID-19 outside of work? (For example: at the grocery store, when you are using transportation, or in other aspects of your daily life) |                |                    |               |
| Infecting your family or friends with COVID-19?                                                                                                      |                |                    |               |

**12. How much time do you, on average, spend using social media?**

- Every day, for 3 hours or more
- Every day, for more than 1 hour but less than 3 hours
- Every day, for less than 1 hour
- Alternate days
- Not often
- Never

**13. From which sources did you get the most information about the COVID-19 vaccine? Select up to 3 sources:**

- Local television news (on TV or on the web)
- English or French language national or cable network news (on TV or on the web)
- Non-English or French language television station (on TV or on the web)
- National newspaper (on paper or on the web)
- My town or other local newspaper (on paper or on the web)
- Non-English or French language newspaper (on paper or on the web)
- English or French language radio
- Non-English or French language radio
- News portal site such as Yahoo! or MSN
- Website of a government agency
- Social media
- Word of mouth
- Through my employer
- Other

**14. How much do you trust the information you got so far about the COVID-19 vaccine?**

- Not at all
- Very little
- Somewhat
- A lot

**15. Did you get information about the COVID-19 vaccine from social media ? [check all that apply]**

- No, I did not
- I am not sure
- Yes, from Facebook
- Yes, from Twitter
- Yes, from Youtube

- Yes, from Instagram
- Yes, from TikTok
- Other

**16. If you were offered a COVID-19 vaccine - at no cost to you - how likely are you to take it?**

- Very likely
- Somewhat likely
- I am not sure
- Somewhat unlikely
- Very unlikely
- I would not take it at the moment but would consider it later on

## **French version**

### **1. Avez-vous reçu le vaccin contre la COVID-19?**

- Oui, j'ai reçu deux injections ou plus
- Oui, j'ai reçu une injection et le vaccin que j'ai reçu ne nécessite qu'une seule injection
- J'ai reçu une dose d'un vaccin COVID-19 à deux doses et je prévois de recevoir ma deuxième dose
- J'ai reçu une dose d'un vaccin COVID-19 à deux doses mais je ne sais pas si j'obtiendrai ma deuxième dose
- J'ai reçu la première dose d'un vaccin COVID-19 à deux doses et je ne prévois pas de recevoir la deuxième dose
- Pas encore, mais j'ai un rendez-vous prévu
- Non, et je n'ai pas de rendez-vous prévu

### **2. Quel âge avez-vous?**

- 18-24
- 25-34
- 35-44
- 45-54
- Plus de 54

### **3. Quel est votre sexe?**

- Homme
- Femme

### **4. Appartenez-vous à l'une des catégories professionnelles suivantes? [cochez toutes les cases applicables]**

- Professionnel de santé
- Agent en établissement résidentiel
- Professionnel de santé publique
- Agent d'établissement correctionnel
- Employé dans la fabrication ou la distribution de vaccins
- Préparateur en pharmacie
- Enseignant ou personnel scolaire
- Opérateur de transformation alimentaire
- Employé en magasin alimentaire
- Agent des services postaux
- Opérateur de transport
- Policier ou pompier
- Volontaire
- Autre

**5. Veuillez sélectionner votre région de résidence**

- Alberta
- Colombie-Britannique
- Manitoba
- Nouveau-Brunswick
- Terre-Neuve-et-Labrador
- Territoires du Nord-Ouest
- Nouvelle-Écosse
- Nunavut
- Ontario
- Île-du-Prince-Édouard
- Québec
- Saskatchewan
- Yukon
- Autre

**6. De quelle race/ethnicité vous considérez-vous?**

- Blanche (caucasienne), non hispanique
- Noire (africaine), non hispanique
- Asiatique, non hispanique
- Plus de 2 origines
- Hispanique
- Je préfère ne pas le préciser
- Autre

**7. Quel est le niveau de scolarité le plus élevé que vous avez atteint?**

- Inférieur aux études secondaires
- Études secondaires ou équivalent
- Études collégiales
- Baccalauréat
- Diplôme d'études supérieures (c.-à-d. Master, PhD, MD, etc.)

**8. Sélectionnez le statut professionnel qui décrit le mieux votre situation actuelle [ne sélectionnez qu'une seule option]:**

- En activité — salarié(e)
- En activité — indépendant
- Sans activité — au chômage

- Sans activité — en congé payé ou congé sans solde
- Sans activité — en recherche d'emploi
- Retraité
- Sans activité — en situation d'invalidité ou indemnisé pour accident du travail
- Sans activité — je ne recherche pas d'emploi
- Autre

**9. Avez-vous été testé(e) positif(ve) à la COVID-19 par un professionnel de santé ou lors d'un test réalisé en laboratoire?**

- Oui, il y a plus d'un an
- Oui, au cours des 12 derniers mois
- Non

**10. Est-ce qu'un membre de votre famille ou un(e) ami(e) proche s'est trouvé(e) dans l'une des situations suivantes? [cochez toutes les cases applicables]:**

- Testé(e) positif(ve) à la COVID-19 sans aucun symptôme ou des symptômes légers
- Testé(e) positif(ve) à la COVID-19 avec des symptômes sévères
- Décédé(e) de la COVID-19
- Ayant perdu son emploi ou subi une réduction de salaire à cause de la COVID-19
- Vacciné(e) contre la COVID-19 et mes amis et les membres de ma famille qui ont reçu le vaccin ont eu une expérience positive
- Aucun membre de ma famille ou ami(e) proche ne s'est trouvé dans l'une des situations décrites ci-dessus

**11. Êtes-vous préoccupé(e) par l'une des situations suivantes?**

|                                                                                                                                                                           | Très préoccupé(e) | Quelque peu préoccupé(e) | Pas préoccupé(e) |
|---------------------------------------------------------------------------------------------------------------------------------------------------------------------------|-------------------|--------------------------|------------------|
| Contracter la COVID-19 au travail? (Par exemple: votre cadre de travail qui n'est pas votre domicile)                                                                     |                   |                          |                  |
| Contracter la COVID-19 en dehors du lieu de travail? (Par exemple: à l'épicerie, dans les transports en commun, ou dans d'autres environnements de votre vie quotidienne) |                   |                          |                  |
| Contaminer votre famille ou vos amis avec la COVID-19?                                                                                                                    |                   |                          |                  |

**12. Combien de temps passez-vous en moyenne sur les réseaux sociaux?**

- Tous les jours pendant 3 heures ou plus
- Tous les jours pendant plus d'une heure, mais moins de 3 heures
- Un jour sur deux



- Pas souvent
- Jamais

**13. Quelle(s) source(s) vous a/ont transmis le plus d'informations sur le vaccin contre la COVID-19?**

**Sélectionnez 3 sources maximum:**

- Le journal télévisé local (à la télévision ou sur internet)
- Les actualités nationales ou du réseau câblé en anglais ou en français (à la télévision ou sur internet)
- Une chaîne de télévision non anglophone ou francophone (à la télévision ou sur internet)
- Les journaux nationaux (sur papier ou sur internet)
- Les journaux de ma ville ou autre journal local (sur papier ou sur internet)
- Les journaux non anglophones ou francophones (sur papier ou sur internet)
- Une radio de langue française ou anglaise
- Une radio de langue française ou non anglaise
- Un portail d'actualités tel que Yahoo! ou MSN
- Un site internet d'une agence gouvernementale
- Les réseaux sociaux
- Le bouche-à-oreille
- Par l'intermédiaire de mon employeur
- Autre

**14. Dans quelle mesure faites-vous confiance aux informations que vous avez obtenues jusqu'à présent sur le vaccin contre la COVID-19? (SingleSelection)**

- Pas du tout
- Très peu
- Un peu
- Beaucoup

**15. Avez-vous obtenu des informations sur le vaccin contre la COVID-19 par l'intermédiaire des réseaux sociaux? [cochez toutes les cases applicables]**

- Non, je n'en ai pas obtenu
- Je ne suis pas sûr(e)
- Oui — sur Facebook
- Oui — sur YouTube
- Oui — sur Instagram
- Oui — sur TikTok
- Oui — sur Twitter
- Autre réseau social

**16. Si l'on vous proposait un vaccin contre la COVID-19 — sans frais pour vous — quelle serait la probabilité que vous l'acceptiez?**

- Très probable
- Assez probable
- Je ne suis pas sûr
- Assez peu probable
- Très improbable
- Je ne l'accepterais pas pour le moment, mais je l'envisagerais ultérieurement
